## **Formin-induced actin cables are required for polarized recruitment of the Ste5 scaffold and high level activation of MAPK Fus3**

**Maosong Qi and Elaine A. Elion**

*Journal of Cell Science* 120, 712 (2007) doi:10.1242/jcs03398

There was an error published in *J. Cell Sci.* **118**, 2837-2848 (2005).

Throughout the article and in the supplementary figures, the plasmid GFP-Ste5 was incorrectly referred to as Ste5-GFP.

The authors apologise for this error.
